# Supplementary material for: One-pot synthesis of a ceria–graphene oxide composite for the efficient removal of arsenic species
Source: Royal Society of Chemistry journal article supplement (doi:10.1039/c6nr07608d), 2016-11-30
Supplement: c6nr07608d1.pdf [file c6nr07608d1.pdf]

*Supporting information.*

**One-pot synthesis of Ceria-Graphene Oxide composite for efficient removal  
of arsenic species**

Tamil S Sakthivel<sup>a</sup>, Soumen Das<sup>a</sup>, Cameron J Prat<sup>b†</sup>, and Sudipta Seal<sup>a,c\*</sup>

a. Advanced materials processing and analysis center (AMPAC), Nanoscience and Technology center (NSTC),  
Materials science and Engineering (MSE), University of Central Florida, Orlando, FL, 32826 (USA). E-mail:  
Sudipta.Seal@ucf.edu

b. Department of Chemistry, Hope College, Hope College, Holland, MI, 49423 (USA).

c. College of Medicine, University of Central Florida, Orlando, FL, 32827 (USA).

† REU student.

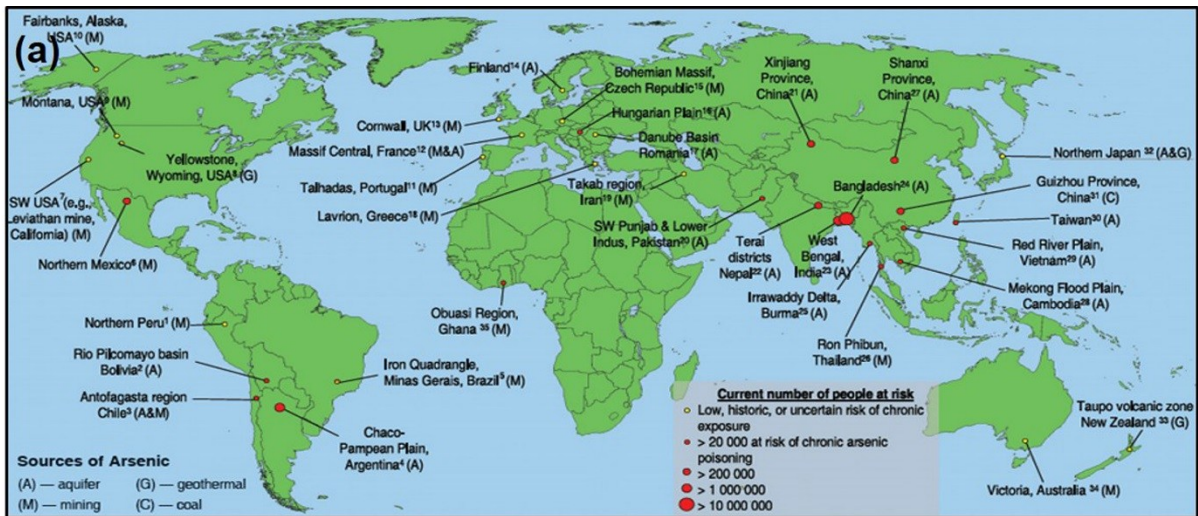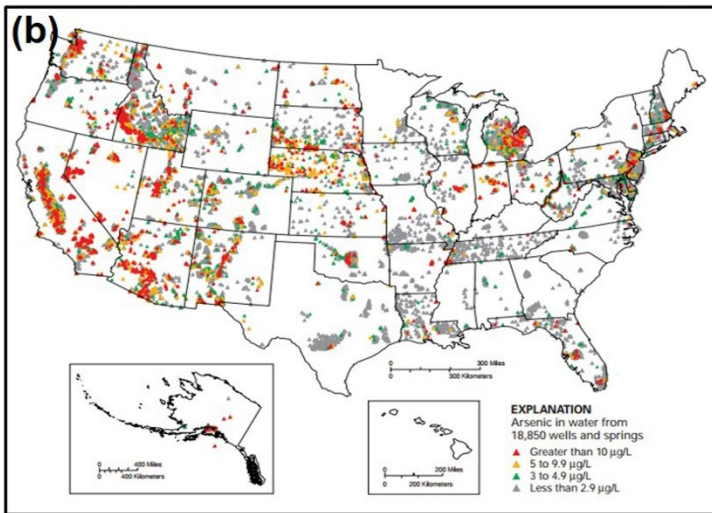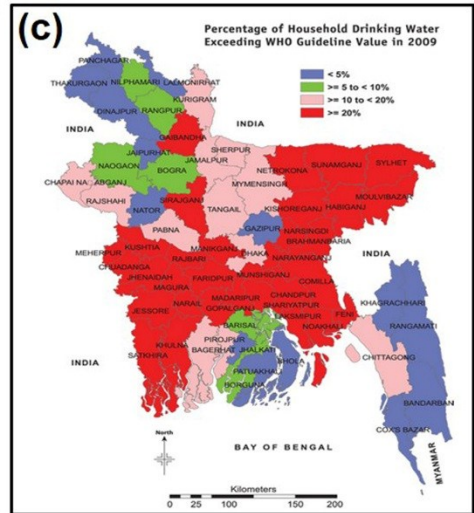

Figure S1. Images of arsenic contamination in ground water (a) globally, (b) the United States, and (c) Bangladesh [1-3].

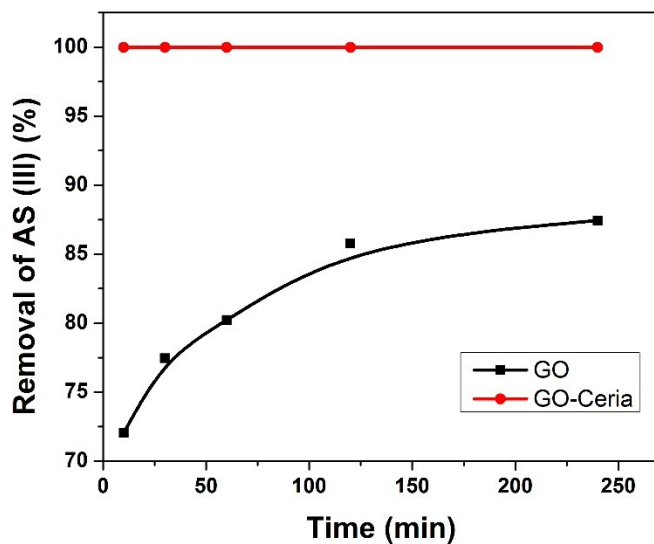

**Figure S2.** Kinetic adsorption results for graphene oxide vs GO-Ceria composite on As (III).

**References:**

1. A. H. W. Michael J. Focazio, Sharon A. Watkins, Dennis R. Helsel, and Marilee A. Horn, *USGS*, 2011.
2. U. FAO, WHO and WSP, *UNICEF*, 2010.
3. K. M. Karin Kemper, *WSP Arsenic Publications* 2005.
